# Supplementary material
Source: Springer Nature journal article supplement (https://www.springermedizin.de/resource/supplementary/12985_2014_2449_MOESM2_ESM.pdf/9606770)

**A**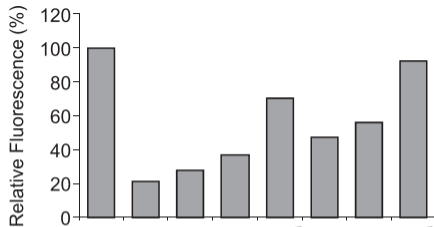

Compound: - - MM-1 MM-2  
 Vif: - + + + + + + +  
 GFP-A3G: + + + + + + + +

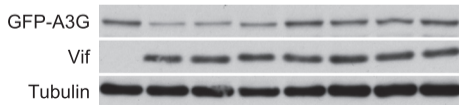

1 2 3 4 5 6 7 8

**B**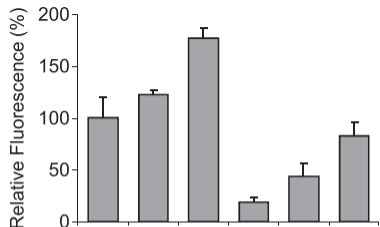

Compound: - MM-1 MM-2 - MM-1 MM-2  
 Vif: - - - + + +  
 GFP-A3G: + + + + + +

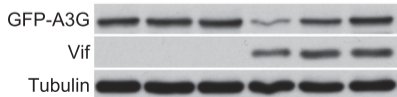

1 2 3 4 5 6

Supplement: MOESM2 [file 9606770]
